# Supplementary material for: Single-cell multiomics: a new frontier in drug research and development
Source: Frontiers journal article supplement (doi:10.3389/fddsv.2024.1474331), 2024-10-22
Supplement: Table_1.xlsx [file Table_1.xlsx]

## Sheet: Table 2
Supplementary Table 1. The computational methods and database for drug R&D.
	Technologies/DataBase	Brief introduction	Website	Function	PMID
AI-based computational metohds	Drug2cell	A new computational pipeline that can integrate drug–target interactions from the ChEMBL database with user-provided single-cell data to comprehensively evaluate drug-target expression in single cell.	https://www.sanger.ac.uk/technology/drug2cell/	Target identification	37438528
	deepDTnet	A deep learning methodology for new target identification and drug repurposing in a heterogeneous drug–gene–disease network embedding 15 types of chemicals, genomic, phenotypic, and cellular network profiles.	https://github.com/ChengF-Lab/deepDTnet		34123272
	DTINet	A computational pipeline to predict novel drug–target interactions from a constructed heterogeneous network, which integrates diverse drug-related information.	https://github.com/luoyunan/DTINet		28924171
	Neural integration of neighbor information for DTI prediction (NeoDTI)	A framework to predict new drug-target interactions from heterogeneous data.	https://github.com/FangpingWan/NeoDTI		30561548
	AlzGPS	A tool to enable searching, visualizing, and analyzing multi-omics, various types of heterogeneous biological networks, and clinical databases for target identification and development of effective prevention and treatment for AD	https://alzgps.lerner.ccf.org		33441136
	omicSynth	A dynamic, open, and accessible resource that leverages large-scale genetic and genomic data for the identification of therapeutic targets in the neurodegenerative disease space.	https://nih-card-ndd-smr-home-syboky.streamlit.app/		38181731
	DLDTI	A learning-based framework for drug-target interaction identification using neural networks and network representation.	https://github.com/CUMTzackGit/DLDTI		33187537
	MHADTI	A framework to predict drug-target interactions via Multiview heterogeneous information network embedding with hierarchical attention mechanisms.	https://github.com/pxystudy/MHADTI		36242566
	DTI-CDF	A cascade deep forest model towards the prediction of drug-target interactions based on hybrid features.	https://github.com//a96123155/DTI-CDF		31885041
	SC2MeNetDrug	A tool to interact scRNA-seq data analysis for uncovering cell-cell communications of microenvironment and predict the potentially effective drugs to perturb the cell-cell communications within disease microenvironment.	https://fuhaililab.github.io/sc2MeNetDrug/	Drug response	38181047
	secDrug	A pipeline to discover novel drug combinations to kill drug-resistant multiple myeloma cells using a greedy set cover algorithm and single-cell multi-omics.	https://github.com/Ujjal-Mukherjee/secDrug/tree/main/CombinationDrugMyeloma		35264575
	scDrug	A pipeline capable of analyzing scRNA-seq data for drug discovery by integrating various bioinformatics tools.	https://github.com/ailabstw/scDrug		36544472
	scDrugPrio	A framework for the analysis of single-cell transcriptomics to address multiple problems in precision medicine in immune-mediated inflammatory diseases.	https://github.com/SDTC-CPMed/scDrugPrio		38509600
	Single-cell drug response (scDR)	A credible method for drug response prediction at single-cell resolution, and helpful in drug resistant mechanism exploration.	https://www.mdpi.com/2073-4425/14/2/268#sec2-genes-14-00268		36833194
	scGen	A model to predict single-cell perturbation response across cell types, studies and species.	https://github.com/theislab/scgen		31363220
	Compositional perturbation autoencoder (CPA)	A deep learning model for predicting the transcriptomic responses of single cells to single or combinatorial treatments from drugs and genetic manipulations.	https://github.com/facebookresearch/CPA		37154091
	scDEAL	A deep transfer learning framework for cancer drug response prediction at the single-cell level by integrating large-scale bulk cell-line data.	https://github.com/OSU-BMBL/scDEAL		36310235
	scGPT	A model that harnesses the power of pretrained transformers on a vast amount of single-cell data.	https://github.com/bowang-lab/scGPT	Model for Single-Cell Multi-omics data in drug discovery and development	38409223
	scMIC	A deep multi-level information fusion framework for clustering single-cell multi-omics data	https://github.com/Zyl-SZU/scMIC		37725723
	SMGR	A algorithm to detect coherent functional regulatory signals and target genes from the jointscRNA-seq and sscATAC-seq data obtained from different samples.	https://github.com/QSong-github/SMGR		35910046
	Constraint-based Optimization of Metabolic Objectives (COMO)	A pipeline that integrates multi-omics data processing, context-specific metabolic model development, simulations, drug databases and disease data to aid drug discovery.	https://github.com/HelikarLab/COMO		37930022
The big database of drug discovery	Therapeutic Target Database (TTD)	A database provides the information about known and explored therapeutic protein and nucleic acid targets, the targeted diseases, pathway information and corresponding drugs directed at each of these targets.	https://db.idrblab.net	Drug-target interaction	37713619
	HMDB	A database that contains largest and most comprehensive, organism-specific metabolomic data in the worldwild.	https://hmdb.ca		34986597
	Manually Annotated Targets and Drugs Online Resource (MATADOR)	A database resource for protein–chemical interactions, including multiple direct and indirect modes of drug–target interactions.	https://www.hsls.pitt.edu/obrc/index.php?page=URL1209757429		17942422
	STITCH	A database of known and predicted chemical–protein interactions, which integrates the evidence derived from experiments, other databases and literatures.	https://ngdc.cncb.ac.cn/databasecommons/database/id/208		26590256
	TDR Targets	A chemogenomic resource for neglected tropical diseases, which is aimed at facilitating the identification and prioritization of drugs and drug targets in neglected disease pathogens.	https://www.tdrtargets.org		22116064
	Potential Drug Target Database (PDTD)	A dual-function database, which integrates an informatics database and a structural database of known and potential drug targets.	https://pubmed.ncbi.nlm.nih.gov/18282303		18282303
	The IUPHAR/BPS Guide to PHARMACOLOGY	An open knowledgebase that provides the information of approved targets and experimental drugs.	https://www.guidetopharmacology.org		37897341
	ASDCD	A database includes 210 antifungal drug combinations and 1225 drug–target interactions involving 105 individual drugs from >12 000 references.	https://ngdc.cncb.ac.cn/databasecommons/database/id/3994		24475134
	TargetGene	A database of cell-type-specific target genes for genetic variants.	https://ngdc.cncb.ac.cn/targetgene/		37870478
	SuperTarget	An extensive database for analyzing 332 828 drug–target interactions.	https://ngdc.cncb.ac.cn/databasecommons/database/id/564		22067455
	IUPHAR/BPS Guide to Pharmacology database	A database compile information on approved drugs, together with affinity and selectivity data, and assigns primary targets that are supported by experimental evidence.	https://www.guidetopharmacology.org/GRAC/LigandDisplayForward?tab=biology&ligandId=7465		37897341
	BindingDB	A public, web-accessible resource of drug-target binding data, shown as measured binding affinities.	https://www.bindingdb.org/bind/index.jsp		26481362
	DrugBank	A publicly available database containing all approved drugs with their mechanisms, interactions, and relevant targets.	https://go.drugbank.com	Drug design	29126136
	Anti-Inflammatory Compounds Database (AICD)	A database to deposit compounds with potential anti-inflammation activities.	http://956023.ichengyun.net/AICD/index.php		31123286
	e-Drug3D	A database of 3D chemical structures of drugs that provides several collections of ready-to-screen SD files of drugs and commercial drug fragments.	http://chemoinfo.ipmc.cnrs.fr/e-drug3d.html		22539672
	CancerDR	A database provides comprehensive information of 148 anti-cancer drugs, and their pharmacological profiling across 952 cancer cell lines.	https://ngdc.cncb.ac.cn/databasecommons/database/id/4278		23486013
	ChEMBL	A database of bioactive molecules with drug-like properties, which brings together chemical, bioactivity and genomic data to aid the translation of genomic information into effective new drugs.	https://www.ebi.ac.uk/chembl	Drug compond	21948594
	PubChem	A database for compounds, including most drugs and drug candidates, with a variety of target response information.	https://pubchem.ncbi.nlm.nih.gov		33151290
	REAL	A database to find new hit molecules using large-scale virtual screening and to search for analogs of your hit molecules.	https://enamine.net/compound-collections/real-compounds/real-database		32152607
	ZINC	A database of commercially-available compounds for virtual screening.	http://zinc.docking.org/		22587354
	Drug Combination Database (DCDB)	A database offering information about drug combinations developed by researchers from Zhejiang University.	https://ngdc.cncb.ac.cn/databasecommons/database/id/4070	Drug combination	20031966
	Continuous Drug Combination Database (CDCDB)	A drug combination database.	https://icc.ise.bgu.ac.il/medical_ai/CDCDB/		35654801
	PROMISCUOUS	A database for network-based drug-repositioning.	http://bioinformatics.charite.de/promiscuous/index.php?site=home		33196798
	SIDER	A database of drugs and adverse drug reactions.	http://sideeffects.embl.de/	Drug toxicity and safety	26481350
	DrugMatrix	A database that is one of the world’s largest toxicogenomic reference resources, contains large-scale gene expression data from tissues of rats administered over 600 drugs, mostly targeting several major organs.	https://norecopa.no/3r-guide/drugmatrix		37820269
	DepMap	A dataset to empower the research community to make discoveries related to cancer vulnerabilities by providing open access to key cancer dependencies, analytical, and visualization tools.	https://depmap.org/portal/		33712601
	Liver Toxicity Knowledge Base (LTKB)	A database contain drugs whose potential to cause DILI (Drug-Induced Liver Injury) in humans has been established using the FDA-approved prescription drug labels	https://www.fda.gov/science-research/liver-toxicity-knowledge-base-ltkb/ltkb-benchmark-dataset		21624500
	PK-DB	A database for pharmacokinetics information from clinical trials	https://pk-db.com		33151297
	clinicalTrials.gov	A database of privately and publicly funded clinical studies conducted around the world.	https://classic.clinicaltrials.gov/	Clinical information	24161049
	PharmaGKB	A database for the understanding of how genetic variation contributes to variation in drug response.	https://www.pharmgkb.org/		29474005
